# Supplementary material
Source: PubMed Central journal article supplement (PMC2860151)

# Pyrenebutyrate Leads to Cellular Binding, Not Intracellular Delivery, of Polyarginine-Quantum Dots

*Amy E. Jablonski<sup>†</sup>, Takashi Kawakami<sup>‡</sup>, Alice Y. Ting<sup>‡\*</sup>, Christine K. Payne<sup>†\*</sup>*

Department of Chemistry, Massachusetts Institute of Technology, 77 Massachusetts Avenue, Massachusetts 02139; School of Chemistry and Biochemistry and Petit Institute for Bioengineering and Bioscience, Georgia Institute of Technology, 901 Atlantic Drive, Atlanta, GA 30332

\*Corresponding Author: christine.payne@chemistry.gatech.edu, Telephone: 404-385-3125, Fax: 404-385-6057; ating@mit.edu, Telephone: 617-452-2021, Fax: 617-253-7927 <sup>†</sup>Georgia Institute of Technology <sup>‡</sup>Massachusetts Institute of Technology

**Cell Culture:** BS-C-1 cells (ATCC, Manassas, VA) were maintained in a 37°C, 5% carbon dioxide environment in modified Eagle's medium (MEM, Invitrogen, Carlsbad, CA) with 10% (v/v) fetal bovine serum (FBS, Invitrogen). Cells were passaged every 3 days. For fluorescence imaging, cells were cultured in 35 mm glass-bottom cell culture dishes (MatTek, Ashland, MA) and imaged in Leibovitz medium (Invitrogen) or PBS (Invitrogen).

**Nuclear Staining:** The cell nucleus was stained with 55 µM 4',6-diamidino-2-phenylindole dilactate (DAPI, Invitrogen) at 37°C for one hour. Cells were washed twice with PBS before additional experiments.

**Microinjection:** A 2 nM streptavidin-QD (655 nm emission, Q10121MP, Invitrogen) solution supplemented with 3% bovine serum albumin (BSA) was used for microinjection (Injectman/FemtoJet, Eppendorf, Hamburg, Germany). After microinjection, cells were washed twice with cell culture medium (modified Eagle's medium supplemented with 10% fetal bovine serum) and incubated at 37°C for 10 min before imaging. PA was not included during microinjection as it led to some endocytosis in the time between microinjection and imaging.

**Microscopy and Image Analysis:** Epi-fluorescence microscopy was carried out with an inverted microscope (Olympus IX71, Center Valley, PA). The magnification and N.A. of the objective used in each experiment is noted in the text. A xenon lamp was used for excitation and a CCD camera (DU-897, Andor, South Windsor, CT) was used for detection. A “DAPI” filter cube (DAPI-1160A, Semrock) was used to image DAPI and a “QD” filter cube which includes a 500 nm long-pass filter was used to image QDs (QDLP-A, Semrock). Confocal microscopy was carried out with a LSM 510 confocal microscope (Carl Zeiss Inc., Germany) using a 40x, 1.30 N.A., oil immersion objective. Quantum dots (655 nm, Invitrogen) were excited with the 488 nm line of an argon ion laser. The excitation laser was separated from fluorescent emission with a 585 nm long pass filter. DAPI was excited with the 364 nm line of an UV laser. The excitation laser was separated from fluorescent emission with a 385 nm – 470 nm band pass filter. The pinhole was set to collect a 0.8  $\mu\text{m}$  optical slice. TEM images were recorded on a Hitachi H-7500 TEM following standard fixation and embedding protocols. Silver enhancement was used to better resolve the QDs. Image J (<http://rsb.info.nih.gov/ij/>) was used for fluorescence image analysis and processing. The brightness and contrast of the fluorescent images were increased for publication purposes with all comparable images increased to the same level.

**Figure S1.** Confocal z-stack of PA-QDs (20 nM, red) bound to the plasma membrane of BS-C-1 cells collected at 2  $\mu\text{m}$  intervals. Cells were incubated at 4°C to prevent internalization. This high concentration of PA-QDs bound to the plasma membrane demonstrates the contribution of out-of-plane fluorescence from the QDs in the thin BS-C-1 cells. DAPI (blue) was used as a nuclear stain.

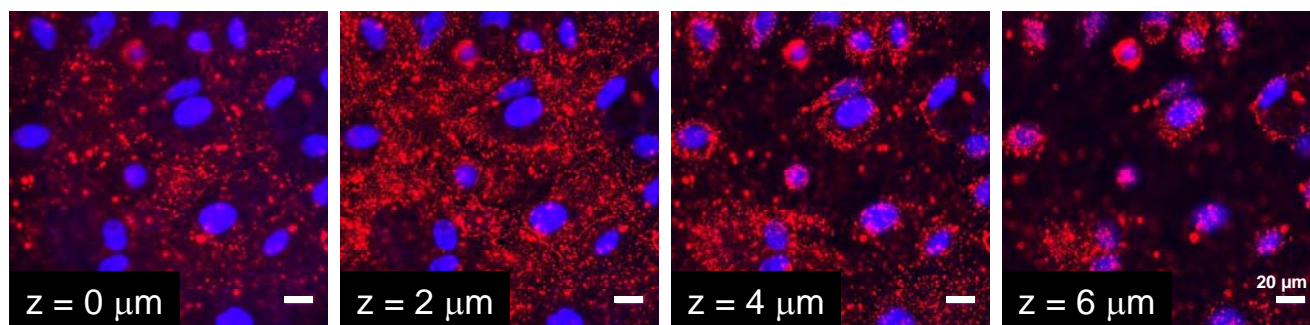

Supplement: NIHMS194331-supplement-1_si_001.pdf [file NIHMS194331-supplement-1_si_001.pdf]
